# Supplementary material for: Premature differentiation of nephron progenitors and dysregulation of gene pathways critical to kidney development in a model of preterm birth
Source: Research Square preprint supplement (doi:10.21203/rs.3.rs-444923/v1), 2021-04-26
Supplement: Supplementary file 1 [file bacce7958e235c8e9e9fa977.docx]

**Supplementary Data: Figures S2**

**Premature differentiation of nephron progenitors and dysregulation of gene pathways critical to kidney development in a model of preterm birth**

Aleksandra Cwiek1, Masako Suzuki3, Kim deRonde1, Mark Conaway4 5, Kevin M. Bennett6, Samir El Dahr7, Kimberly Reidy2#, Jennifer R Charlton1#*


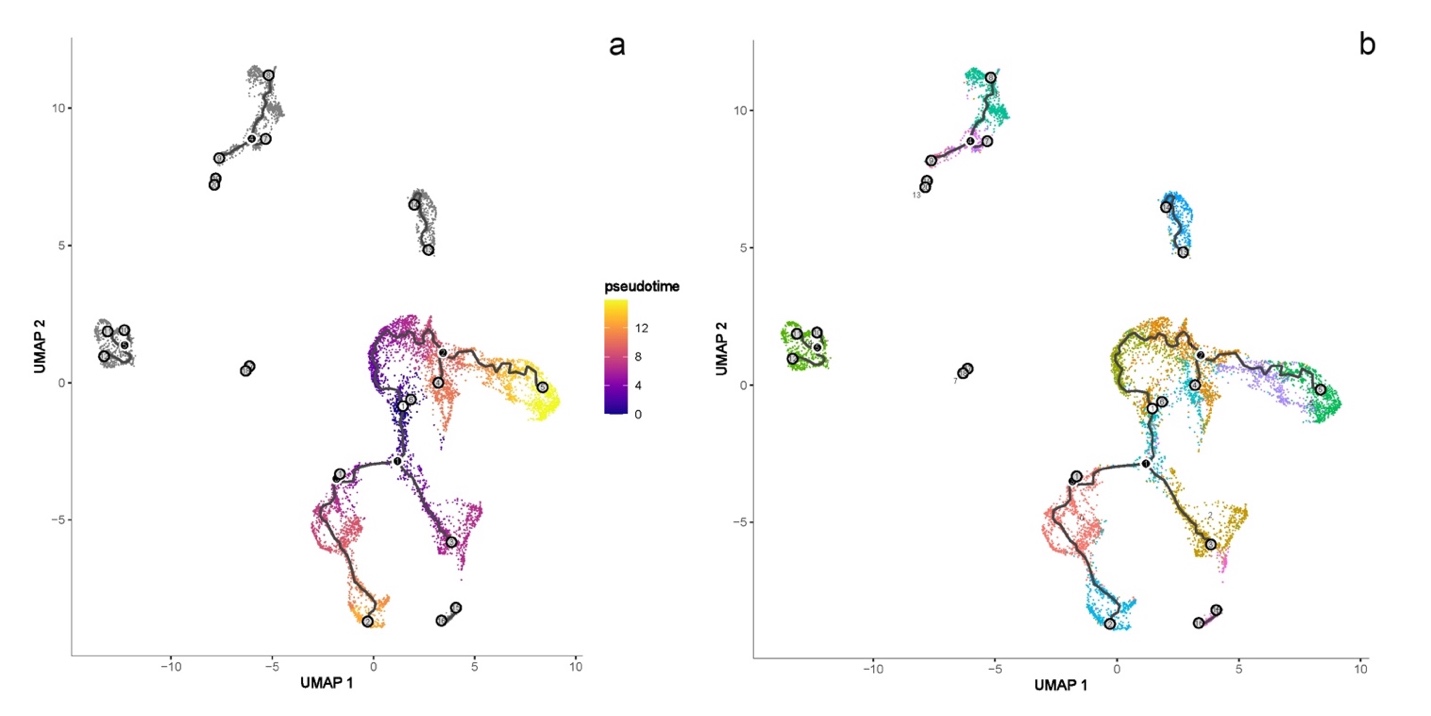


**Supplementary Fig. S2. Pseudotime analysis.** Using data from preterm and term mouse kidneys a 20 dpc, cell expression profiles (marked with single points) were generated in a two-dimensional independent component space. The edges of the minimum spanning tree (MST) created by the Monocle algorithm are indicated by the connected dots. Solid grey line shows the main diameter path of the MST and provides the backbone of Monocle's algorithm pseudotime ordering of the cells. (a) Pseudotime analysis result overlapped with the results from clustering of each cell type (b).
